# Supplementary material
Source: PubMed Central journal article supplement (PMC2867334)
Supplement: NIHMS188327-supplement-etable.pdf [file NIHMS188327-supplement-etable.pdf]

# Interactive Effect of Stressful Life Events and the Serotonin Transporter 5-HTTLPR Genotype on Posttraumatic Stress Disorder Diagnosis in 2 Independent Populations

Pingxing Xie, BS; Henry R. Kranzler, MD; James Poling, PhD; Murray B. Stein, MD, MPH; Raymond F. Anton, MD; Kathleen Brady, MD, PhD; Roger D. Weiss, MD; Lindsay Farrer, PhD; Joel Gelernter, MD

Arch Gen Psychiatry. 2009;66(11):1201-1209

**Table. PTSD Comorbidities and Their Distributions by 5-HTTLPR Genotypes**

|                       | No. (%)                      |                          |          |         | Whole Sample, No. (%) |            |            |         |      | Sample With PTSD, No. (%) |           |           |     |     |
|-----------------------|------------------------------|--------------------------|----------|---------|-----------------------|------------|------------|---------|------|---------------------------|-----------|-----------|-----|-----|
|                       | Sample Without PTSD (n=1023) | Sample With PTSD (n=229) |          |         | L'L'                  | L'S'       | S'S'       |         |      | L'L'                      | L'S'      | S'S'      |     |     |
|                       | $\chi^2$                     | P Value                  | $\chi^2$ | P Value | $\chi^2$              | P Value    | $\chi^2$   | P Value |      |                           |           |           |     |     |
| Male sex              | 560 (54.7)                   | 96 (41.9)                | 12.3     | <.001   | 163 (46.2)            | 327 (53.9) | 166 (56.8) | 8.3     | .02  | 18 (34.0)                 | 49 (41.5) | 29 (50.0) | 2.9 | .23 |
| EA ethnicity          | 468 (45.7)                   | 114 (50.0)               | 1.3      | .26     | 137 (38.8)            | 298 (49.1) | 147 (50.3) | 11.8    | .003 | 21 (40.0)                 | 63 (53.4) | 30 (51.7) | 2.9 | .24 |
| Psychiatric disorders |                              |                          |          |         |                       |            |            |         |      |                           |           |           |     |     |
| ADHD                  | 52 (5.1)                     | 23 (10.0)                | 8.2      | .004    | 21 (5.9)              | 36 (5.9)   | 18 (6.2)   | 0.02    | .99  | 3 (5.7)                   | 13 (11.0) | 7 (12.1)  | 1.5 | .47 |
| ASPD                  | 138 (13.5)                   | 41 (17.9)                | 3.0      | .08     | 45 (12.7)             | 94 (15.5)  | 40 (13.7)  | 1.5     | .48  | 9 (17.0)                  | 18 (15.3) | 14 (24.1) | 2.1 | .35 |
| PG                    | 70 (6.8)                     | 30 (13.1)                | 10.0     | .002    | 24 (6.8)              | 47 (7.7)   | 29 (9.9)   | 2.2     | .33  | 6 (11.3)                  | 15 (12.7) | 9 (15.5)  | 0.5 | .79 |
| Panic disorder        | 51 (5.0)                     | 34 (14.8)                | 28.8     | <.001   | 30 (8.5)              | 36 (6.0)   | 19 (6.5)   | 2.4     | .31  | 10 (18.9)                 | 15 (12.7) | 9 (15.5)  | 1.1 | .57 |
| Agoraphobia           | 42 (4.1)                     | 23 (10.0)                | 13.4     | <.001   | 13 (3.7)              | 38 (6.3)   | 14 (4.8)   | 3.1     | .21  | 2 (3.8)                   | 15 (12.7) | 6 (10.3)  | 3.2 | .20 |
| Social phobia         | 47 (4.6)                     | 25 (10.9)                | 13.8     | <.001   | 19 (5.4)              | 39 (6.4)   | 14 (4.8)   | 1.1     | .58  | 4 (7.5)                   | 16 (13.6) | 5 (8.6)   | 1.8 | .41 |
| MDD                   | 135 (13.2)                   | 74 (32.3)                | 49.2     | <.001   | 61 (17.3)             | 103 (17.0) | 45 (15.4)  | 0.47    | .79  | 23 (43.4)                 | 34 (28.8) | 17 (29.3) | 3.9 | .14 |
| BPD                   | 42 (4.1)                     | 23 (10.0)                | 13.4     | <.001   | 14 (4.0)              | 36 (5.9)   | 15 (5.1)   | 1.8     | .42  | 4 (7.5)                   | 15 (12.7) | 4 (6.9)   | 1.9 | .38 |

Abbreviations: ADHD, attention-deficit/hyperactivity disorder; ASPD, antisocial personality disorder; BPD, bipolar disorder; EA, European American; MDD, major depressive disorder; PG, pathological gambling; PTSD, posttraumatic stress disorder.
